# Supplementary material for: The effect of BPIFA1/SPLUNC1 genetic variation on its expression and function in asthmatic airway epithelium
Source: JCI journal article supplement (doi:10.1172/jci.insight.127237), 2019-04-17
Supplement: sd1 [file 1]

## Supplemental Figures

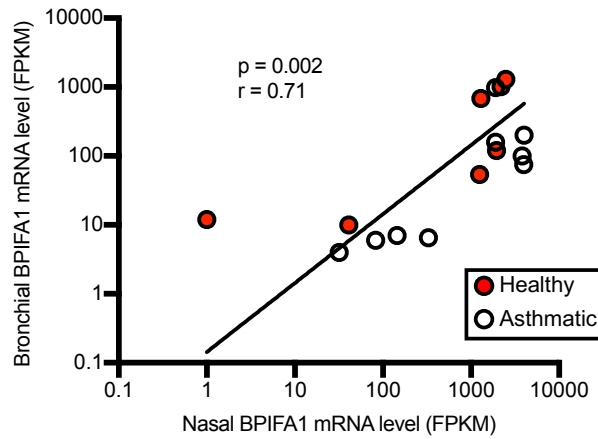

**Supplementary Figure 1.** Strong positive correlation in BPIFA1 mRNA expression levels between brushed nasal and bronchial epithelium obtained from the same healthy (n=7) and asthmatic (n=9) subjects (age, 19 to 52 years). BPIFA1 mRNA expression was determined from whole transcriptome RNA-sequencing analysis, and is expressed in Fragments Per Kilobase of exon per million fragments mapped (FPKM). A Pearson's correlation analysis was performed.

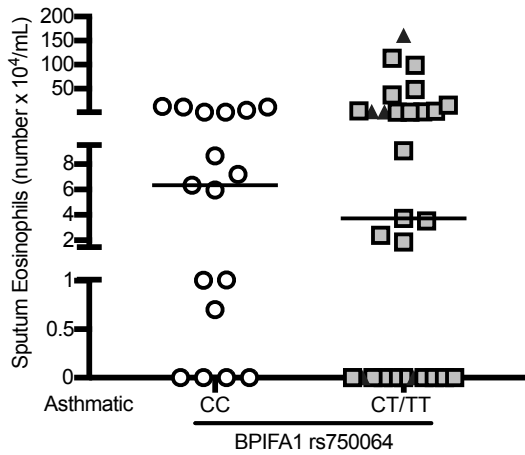

**Supplementary Figure 2.** Asthmatics with the BPIFA1 rs750064 CC genotype trend to have higher sputum eosinophils than the CT genotype. Induced sputum was collected from n=46 subjects (n=39 adults, n=7 children). The black line represents the median number.

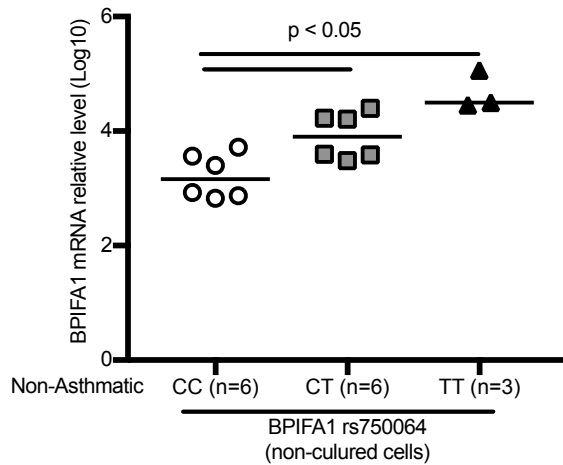

**Supplementary Figure 3.** Non-asthmatic subjects (n=6) with the rs750064 CC genotype have significantly less BPIFA1 mRNA expression than subjects with the CT (n=6) and TT (n=3) genotypes. BPIFA1 mRNA expression of non-cultured nasal brushing cells was measured in non-asthmatics who did not have a known lung disease (n=5) or were diagnosed with other lung diseases (n=10). P values represent a Kruskal-Wallis test.
